# Supplementary material for: Aggregation morphologies of a series of heterogemini surfactants with a hydroxyl head group in aqueous solution
Source: Royal Society of Chemistry journal article supplement (doi:10.1039/c4sm01524j), 2014-09-30
Supplement: c4sm01524j1.pdf [file c4sm01524j1.pdf]

## Supplementary Information

### Aggregation morphologies of a series of heterogemini surfactants with a hydroxyl headgroup in aqueous solution

Shengwei Liu,<sup>a</sup> Xiaowen Wang,<sup>b</sup> Liming Chen,<sup>b</sup> Linxi Hou\*<sup>b</sup> and Tianhua Zhou\*<sup>c</sup>

<sup>a</sup>Department of Physical Chemistry, Faculty of Material Science and Chemical Engineering, Ningbo University, Ningbo, Zhejiang, 315211, China

<sup>b</sup> Department of Materials-Oriented Chemical Engineering, College of Chemical Engineering, Fuzhou University, Fuzhou, Fujian, 350108, China

<sup>c</sup>Department of Chemical and Biomolecular Engineering, School of Chemical and Biomedical Engineering, Nanyang Technological University, 62 Nanyang Drive, Singapore 637459, Singapore

#### Synthesis of C<sub>m</sub>OhpNC<sub>n</sub>

1. The molecular structure of C<sub>m</sub>OhpNC<sub>n</sub> is shown as follows,

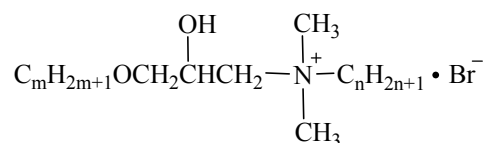

$m, n = 10, 8; 10, 14; 12, 8; 12, 10; 12, 12; 12, 14; 14, 8$  and  $14, 10$

Starting materials: Epichlorohydrin, *N, N*-dimethyldecylamine, *n*-decanol, *n*-dodecanol, *n*-tetradecanol, *n*-hexadecanol, hydrobromide were purchased from Sinopharm Chemical Reagent Co., Ltd (China), *N, N*-dimethyloctylamine, *N, N*-dimethyldodecylamine, *N, N*-dimethyltetradecylamine were purchased from Tokyo Chemical Industry Co., Ltd (Japan), All the reagents used were of analytical grade.

#### 2. Synthetic routes

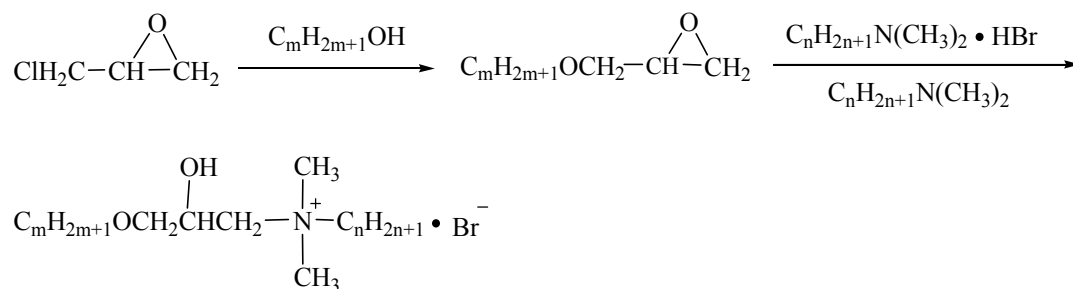

#### 3. A detailed description about the synthesis

This compound was synthesized with the method reported by Tianhua Zhou<sup>1</sup>, which is briefly described as follows: *N,N*-dimethylalkyl amine (0.01mol, 1.0 equiv) and *N,N*-dimethylalkyl amine hydrobromide (0.01mol, 1.0 equiv) were added into a mixed ethanol-water solution (80:20, 60ml). The mixture was heated to 50°C under stirring, and then alkyl glycidyl ether (0.01mmol, 1.0 equiv) prepared from epichlorohydrin<sup>1, 2</sup> were added under vigorous agitation. After reacting for 4 hours, the mixture was cooled and the solvent was removed under reduced pressure. The product was recrystallized from ethyl acetate three times, followed by vacuum drying to give C<sub>m</sub>OhpNC<sub>n</sub> (*m, n* = 10, 8; 10, 14; 12, 8; 12, 10; 12, 12; 12, 14; 14, 8 and 14, 10) as white solids. The overall yield is from 29 to 79%.

#### 4. <sup>1</sup>HNMR and elemental analysis of final products

**C<sub>10</sub>OhpNC<sub>8</sub> (400MHz, CDCl<sub>3</sub>, TMS):** δ 0.87-0.88 (*t*, 6H, 2CH<sub>3</sub>-CH<sub>2</sub>-), 1.26-1.34 (*m*, 24H, CH<sub>3</sub>-(CH<sub>2</sub>)<sub>7</sub>-CH<sub>2</sub>-CH<sub>2</sub>-O- and CH<sub>3</sub>-(CH<sub>2</sub>)<sub>5</sub>-CH<sub>2</sub>-CH<sub>2</sub>-N<sup>+</sup>(CH<sub>3</sub>)<sub>2</sub>-), 1.52-1.53 (*m*, 2H, CH<sub>3</sub>-(CH<sub>2</sub>)<sub>7</sub>-CH<sub>2</sub>-CH<sub>2</sub>-O-CH<sub>2</sub>-), 1.74 (*m*, 2H, -CH<sub>2</sub>-CH<sub>2</sub>-N<sup>+</sup>(CH<sub>3</sub>)<sub>2</sub>-CH<sub>2</sub>-), 3.39-3.49 (*m*, 10H, -CH<sub>2</sub>-N<sup>+</sup>(CH<sub>3</sub>)<sub>2</sub>-CH<sub>2</sub>-, -CH<sub>2</sub>-N<sup>+</sup>(CH<sub>3</sub>)<sub>2</sub>-CH<sub>2</sub>-CH(OH)- and -CH<sub>2</sub>-CH<sub>2</sub>-O-CH<sub>2</sub>-CH(OH)-), 3.51-3.60 (*m*, 4H, -CH<sub>2</sub>-O-CH<sub>2</sub>-CH(OH)- and -N<sup>+</sup>(CH<sub>3</sub>)<sub>2</sub>-CH<sub>2</sub>-CH(OH)-), and 4.48 ppm (*m*, 1H, -O-CH<sub>2</sub>-CH(OH)-CH<sub>2</sub>-N<sup>+</sup>(CH<sub>3</sub>)<sub>2</sub>-); Anal Calcd for C<sub>23</sub>H<sub>50</sub>BrNO<sub>2</sub>: C, 61.04; H, 11.14; N, 3.10. Found: C, 60.66; H, 11.49; N, 2.72.

**C<sub>10</sub>OhpNC<sub>14</sub> (400MHz, CDCl<sub>3</sub>, TMS):** δ 0.81-0.83 (*t*, 6H, 2CH<sub>3</sub>-CH<sub>2</sub>-), 1.18 (*m*, 36H, CH<sub>3</sub>-(CH<sub>2</sub>)<sub>7</sub>-CH<sub>2</sub>-CH<sub>2</sub>-O- and CH<sub>3</sub>-(CH<sub>2</sub>)<sub>11</sub>-CH<sub>2</sub>-CH<sub>2</sub>-N<sup>+</sup>(CH<sub>3</sub>)<sub>2</sub>-), 1.44-1.47 (*m*, 2H, CH<sub>3</sub>-(CH<sub>2</sub>)<sub>7</sub>-CH<sub>2</sub>-CH<sub>2</sub>-O-CH<sub>2</sub>-), 1.67 (*m*, 2H, -CH<sub>2</sub>-CH<sub>2</sub>-N<sup>+</sup>(CH<sub>3</sub>)<sub>2</sub>-CH<sub>2</sub>-), 3.31-3.36 (*m*, 10H, -CH<sub>2</sub>-N<sup>+</sup>(CH<sub>3</sub>)<sub>2</sub>-CH<sub>2</sub>-, -CH<sub>2</sub>-N<sup>+</sup>(CH<sub>3</sub>)<sub>2</sub>-CH<sub>2</sub>-CH(OH)- and -CH<sub>2</sub>-CH<sub>2</sub>-O-CH<sub>2</sub>-CH(OH)-), 3.48-3.52 (*m*, 4H, -CH<sub>2</sub>-O-CH<sub>2</sub>-CH(OH)- and -N<sup>+</sup>(CH<sub>3</sub>)<sub>2</sub>-CH<sub>2</sub>-CH(OH)-), and 4.50 ppm (*m*, 1H, -O-CH<sub>2</sub>-CH(OH)-CH<sub>2</sub>-N<sup>+</sup>(CH<sub>3</sub>)<sub>2</sub>-); Calcd for C<sub>29</sub>H<sub>62</sub>BrNO<sub>2</sub>: C, 64.90; H, 11.64; N, 2.61. Found: C, 63.93; H, 12.08; N, 2.09.

**C<sub>12</sub>OhpNC<sub>8</sub> (400MHz, CDCl<sub>3</sub>, TMS):** δ 0.88 (*t*, 6H, 2CH<sub>3</sub>-CH<sub>2</sub>-), 1.26 (*m*, 28H, CH<sub>3</sub>-(CH<sub>2</sub>)<sub>9</sub>-CH<sub>2</sub>-CH<sub>2</sub>-O- and CH<sub>3</sub>-(CH<sub>2</sub>)<sub>5</sub>-CH<sub>2</sub>-CH<sub>2</sub>-N<sup>+</sup>(CH<sub>3</sub>)<sub>2</sub>-), 1.52 (*m*, 2H, CH<sub>3</sub>-(CH<sub>2</sub>)<sub>7</sub>-CH<sub>2</sub>-CH<sub>2</sub>-O-CH<sub>2</sub>-), 1.74 (*m*, 2H, -CH<sub>2</sub>-CH<sub>2</sub>-N<sup>+</sup>(CH<sub>3</sub>)<sub>2</sub>-CH<sub>2</sub>-), 3.39-3.42 (*m*, 10H, -CH<sub>2</sub>-N<sup>+</sup>(CH<sub>3</sub>)<sub>2</sub>-CH<sub>2</sub>-, -CH<sub>2</sub>-N<sup>+</sup>(CH<sub>3</sub>)<sub>2</sub>-CH<sub>2</sub>-CH(OH)- and -CH<sub>2</sub>-CH<sub>2</sub>-O-CH<sub>2</sub>-CH(OH)-), 3.57 (*m*, 4H, -CH<sub>2</sub>-O-CH<sub>2</sub>-CH(OH)- and -N<sup>+</sup>(CH<sub>3</sub>)<sub>2</sub>-CH<sub>2</sub>-CH(OH)-), and 4.49 ppm (*m*, 1H, -O-CH<sub>2</sub>-CH(OH)-CH<sub>2</sub>-N<sup>+</sup>(CH<sub>3</sub>)<sub>2</sub>-); Calcd for C<sub>25</sub>H<sub>54</sub>BrNO<sub>2</sub>: C, 62.48; H, 11.33; N, 2.91. Found: C, 62.17; H, 11.52; N, 2.54.

**C<sub>12</sub>OhpNC<sub>10</sub> (400MHz, CDCl<sub>3</sub>, TMS):** δ 0.88 (*t*, 6H, 2CH<sub>3</sub>-CH<sub>2</sub>-), 1.26 (*m*, 32H, CH<sub>3</sub>-(CH<sub>2</sub>)<sub>9</sub>-CH<sub>2</sub>-CH<sub>2</sub>-O- and CH<sub>3</sub>-(CH<sub>2</sub>)<sub>7</sub>-CH<sub>2</sub>-CH<sub>2</sub>-N<sup>+</sup>(CH<sub>3</sub>)<sub>2</sub>-), 1.52 (*m*, 2H, CH<sub>3</sub>-(CH<sub>2</sub>)<sub>7</sub>-CH<sub>2</sub>-CH<sub>2</sub>-O-CH<sub>2</sub>-), 1.74 (*m*, 2H, -CH<sub>2</sub>-CH<sub>2</sub>-N<sup>+</sup>(CH<sub>3</sub>)<sub>2</sub>-CH<sub>2</sub>-), 3.39-3.43 (*m*, 10H, -CH<sub>2</sub>-N<sup>+</sup>(CH<sub>3</sub>)<sub>2</sub>-CH<sub>2</sub>-, -CH<sub>2</sub>-N<sup>+</sup>(CH<sub>3</sub>)<sub>2</sub>-CH<sub>2</sub>-CH(OH)- and -CH<sub>2</sub>-CH<sub>2</sub>-O-CH<sub>2</sub>-CH(OH)-), 3.56 (*m*, 4H, -CH<sub>2</sub>-O-CH<sub>2</sub>-CH(OH)- and -N<sup>+</sup>(CH<sub>3</sub>)<sub>2</sub>-CH<sub>2</sub>-CH(OH)-), and 4.49 ppm (*m*, 1H, -O-CH<sub>2</sub>-CH(OH)-CH<sub>2</sub>-N<sup>+</sup>(CH<sub>3</sub>)<sub>2</sub>-); Calcd for C<sub>27</sub>H<sub>58</sub>BrNO<sub>2</sub>: C, 63.75; H, 11.49; N, 2.75. Found: C, 63.01; H, 11.38; N, 2.47.

**C<sub>12</sub>OhpNC<sub>12</sub> (400MHz, CDCl<sub>3</sub>, TMS):** δ 0.81 (*t*, 6H, 2CH<sub>3</sub>-CH<sub>2</sub>-), 1.24 (*m*, 36H, CH<sub>3</sub>-(CH<sub>2</sub>)<sub>9</sub>-CH<sub>2</sub>-CH<sub>2</sub>-O- and CH<sub>3</sub>-(CH<sub>2</sub>)<sub>9</sub>-CH<sub>2</sub>-CH<sub>2</sub>-N<sup>+</sup>(CH<sub>3</sub>)<sub>2</sub>-), 1.45 (*m*, 2H, CH<sub>3</sub>-(CH<sub>2</sub>)<sub>7</sub>-CH<sub>2</sub>-CH<sub>2</sub>-O-CH<sub>2</sub>-), 1.67 (*m*, 2H, -CH<sub>2</sub>-CH<sub>2</sub>-N<sup>+</sup>(CH<sub>3</sub>)<sub>2</sub>-CH<sub>2</sub>-), 3.32-3.37 (*m*, 10H, -CH<sub>2</sub>-N<sup>+</sup>(CH<sub>3</sub>)<sub>2</sub>-CH<sub>2</sub>-, -CH<sub>2</sub>-N<sup>+</sup>(CH<sub>3</sub>)<sub>2</sub>-CH<sub>2</sub>-CH(OH)- and -CH<sub>2</sub>-CH<sub>2</sub>-O-CH<sub>2</sub>-CH(OH)-), 3.51 (*m*, 4H, -CH<sub>2</sub>-O-CH<sub>2</sub>-CH(OH)- and -N<sup>+</sup>(CH<sub>3</sub>)<sub>2</sub>-CH<sub>2</sub>-CH(OH)-), and 4.41 ppm (*m*, 1H, -O-CH<sub>2</sub>-CH(OH)-CH<sub>2</sub>-N<sup>+</sup>(CH<sub>3</sub>)<sub>2</sub>-); Calcd for C<sub>29</sub>H<sub>62</sub>BrNO<sub>2</sub>: C, 64.90; H, 11.64; N, 2.61. Found: C, 63.86; H, 12.12; N, 2.29.

**C<sub>12</sub>OhpNC<sub>14</sub> (400MHz, CDCl<sub>3</sub>, TMS):** d 0.82 (*t*, 6H, 2CH<sub>3</sub>-CH<sub>2</sub>-), 1.24 (*m*, 40H, CH<sub>3</sub>-(CH<sub>2</sub>)<sub>9</sub>-CH<sub>2</sub>-CH<sub>2</sub>-O- and CH<sub>3</sub>-(CH<sub>2</sub>)<sub>11</sub>-CH<sub>2</sub>-CH<sub>2</sub>-N<sup>+</sup>(CH<sub>3</sub>)<sub>2</sub>-), 1.46 (*m*, 2H, CH<sub>3</sub>-(CH<sub>2</sub>)<sub>7</sub>-CH<sub>2</sub>-CH<sub>2</sub>-O-CH<sub>2</sub>-), 1.67 (*m*, 2H, -CH<sub>2</sub>-CH<sub>2</sub>-N<sup>+</sup>(CH<sub>3</sub>)<sub>2</sub>-CH<sub>2</sub>-), 3.32-3.37 (*m*, 10H, -CH<sub>2</sub>-N<sup>+</sup>(CH<sub>3</sub>)<sub>2</sub>-CH<sub>2</sub>-, -CH<sub>2</sub>-N<sup>+</sup>(CH<sub>3</sub>)<sub>2</sub>-CH<sub>2</sub>-CH(OH)- and -CH<sub>2</sub>-CH<sub>2</sub>-O-CH<sub>2</sub>-CH(OH)-), 3.51(*m*, 4H, -CH<sub>2</sub>-O-CH<sub>2</sub>-CH(OH)- and -N<sup>+</sup>(CH<sub>3</sub>)<sub>2</sub>-CH<sub>2</sub>-CH(OH)-), and 4.42 ppm (*m*, 1H, -O-CH<sub>2</sub>-CH(OH)-CH<sub>2</sub>-N<sup>+</sup>(CH<sub>3</sub>)<sub>2</sub>-); Calcd for C<sub>31</sub>H<sub>66</sub>BrNO<sub>2</sub>: C, 65.93; H, 11.78; N, 2.48. Found: C, 63.30; H, 12.11; N, 2.32.

**C<sub>14</sub>OhpNC<sub>8</sub> (400MHz, CDCl<sub>3</sub>, TMS):**d 0.82 (*t*, 6H, 2CH<sub>3</sub>-CH<sub>2</sub>-), 1.19-1.28 (*m*, 32H, CH<sub>3</sub>-(CH<sub>2</sub>)<sub>11</sub>-CH<sub>2</sub>-CH<sub>2</sub>-O- and CH<sub>3</sub>-(CH<sub>2</sub>)<sub>5</sub>-CH<sub>2</sub>-CH<sub>2</sub>-N<sup>+</sup>(CH<sub>3</sub>)<sub>2</sub>-), 1.44-1.47 (*m*, 2H, CH<sub>3</sub>-(CH<sub>2</sub>)<sub>7</sub>-CH<sub>2</sub>-CH<sub>2</sub>-O-CH<sub>2</sub>-), 1.68 (*m*, 2H, -CH<sub>2</sub>-CH<sub>2</sub>-N<sup>+</sup>(CH<sub>3</sub>)<sub>2</sub>-CH<sub>2</sub>-), 3.31-3.37 (*m*, 10H, -CH<sub>2</sub>-N<sup>+</sup>(CH<sub>3</sub>)<sub>2</sub>-CH<sub>2</sub>-, -CH<sub>2</sub>-N<sup>+</sup>(CH<sub>3</sub>)<sub>2</sub>-CH<sub>2</sub>-CH(OH)- and -CH<sub>2</sub>-CH<sub>2</sub>-O-CH<sub>2</sub>-CH(OH)-), 3.50-3.54 (*m*, 4H, -CH<sub>2</sub>-O-CH<sub>2</sub>-CH(OH)- and -N<sup>+</sup>(CH<sub>3</sub>)<sub>2</sub>-CH<sub>2</sub>-CH(OH)-), and 4.43 ppm (*m*, 1H, -O-CH<sub>2</sub>-CH(OH)-CH<sub>2</sub>-N<sup>+</sup>(CH<sub>3</sub>)<sub>2</sub>-); Calcd for C<sub>27</sub>H<sub>58</sub>BrNO<sub>2</sub>: C, 63.75; H, 11.49; N, 2.75. Found: C, 63.07; H, 12.15; N, 2.59.

**C<sub>14</sub>OhpNC<sub>10</sub> (400MHz, CDCl<sub>3</sub>, TMS):** d 0.81 (*t*, 6H, 2CH<sub>3</sub>-CH<sub>2</sub>-), 1.19-1.28 (*m*, 36H, CH<sub>3</sub>-(CH<sub>2</sub>)<sub>11</sub>-CH<sub>2</sub>-CH<sub>2</sub>-O- and CH<sub>3</sub>-(CH<sub>2</sub>)<sub>7</sub>-CH<sub>2</sub>-CH<sub>2</sub>-N<sup>+</sup>(CH<sub>3</sub>)<sub>2</sub>-), 1.44-1.47 (*m*, 2H, CH<sub>3</sub>-(CH<sub>2</sub>)<sub>7</sub>-CH<sub>2</sub>-CH<sub>2</sub>-O-CH<sub>2</sub>-), 1.67 (*m*, 2H, -CH<sub>2</sub>-CH<sub>2</sub>-N<sup>+</sup>(CH<sub>3</sub>)<sub>2</sub>-CH<sub>2</sub>-), 3.32-3.37 (*m*, 10H, -CH<sub>2</sub>-N<sup>+</sup>(CH<sub>3</sub>)<sub>2</sub>-CH<sub>2</sub>-, -CH<sub>2</sub>-N<sup>+</sup>(CH<sub>3</sub>)<sub>2</sub>-CH<sub>2</sub>-CH(OH)- and -CH<sub>2</sub>-CH<sub>2</sub>-O-CH<sub>2</sub>-CH(OH)-), 3.50-3.53 (*m*, 4H, -CH<sub>2</sub>-O-CH<sub>2</sub>-CH(OH)- and -N<sup>+</sup>(CH<sub>3</sub>)<sub>2</sub>-CH<sub>2</sub>-CH(OH)-), and 4.42 ppm (*s*, 1H, -O-CH<sub>2</sub>-CH(OH)-CH<sub>2</sub>-N<sup>+</sup>(CH<sub>3</sub>)<sub>2</sub>-); Calcd for C<sub>29</sub>H<sub>62</sub>BrNO<sub>2</sub>: C, 64.90; H, 11.64; N, 2.61. Found: C, 63.56; H, 12.03; N, 2.28.

## Measurements of C<sub>m</sub>OhpNC<sub>n</sub>

### 1 Krafft temperature

The electric conductivities of C<sub>m</sub>OhpNC<sub>n</sub> were measured by Model Delta 326 conductometer with the temperature ranging from 15 to 70 °C. The Krafft temperatures were determined by the break of conductivity vs. temperature plots.<sup>2</sup>

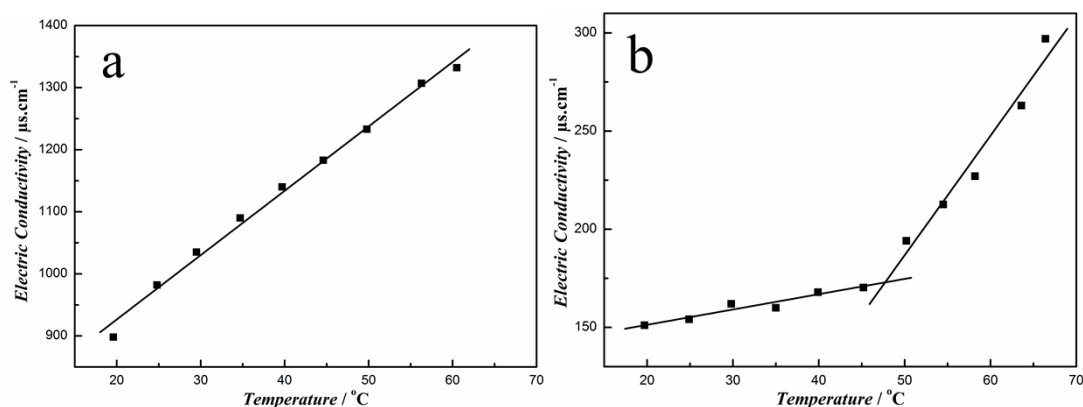

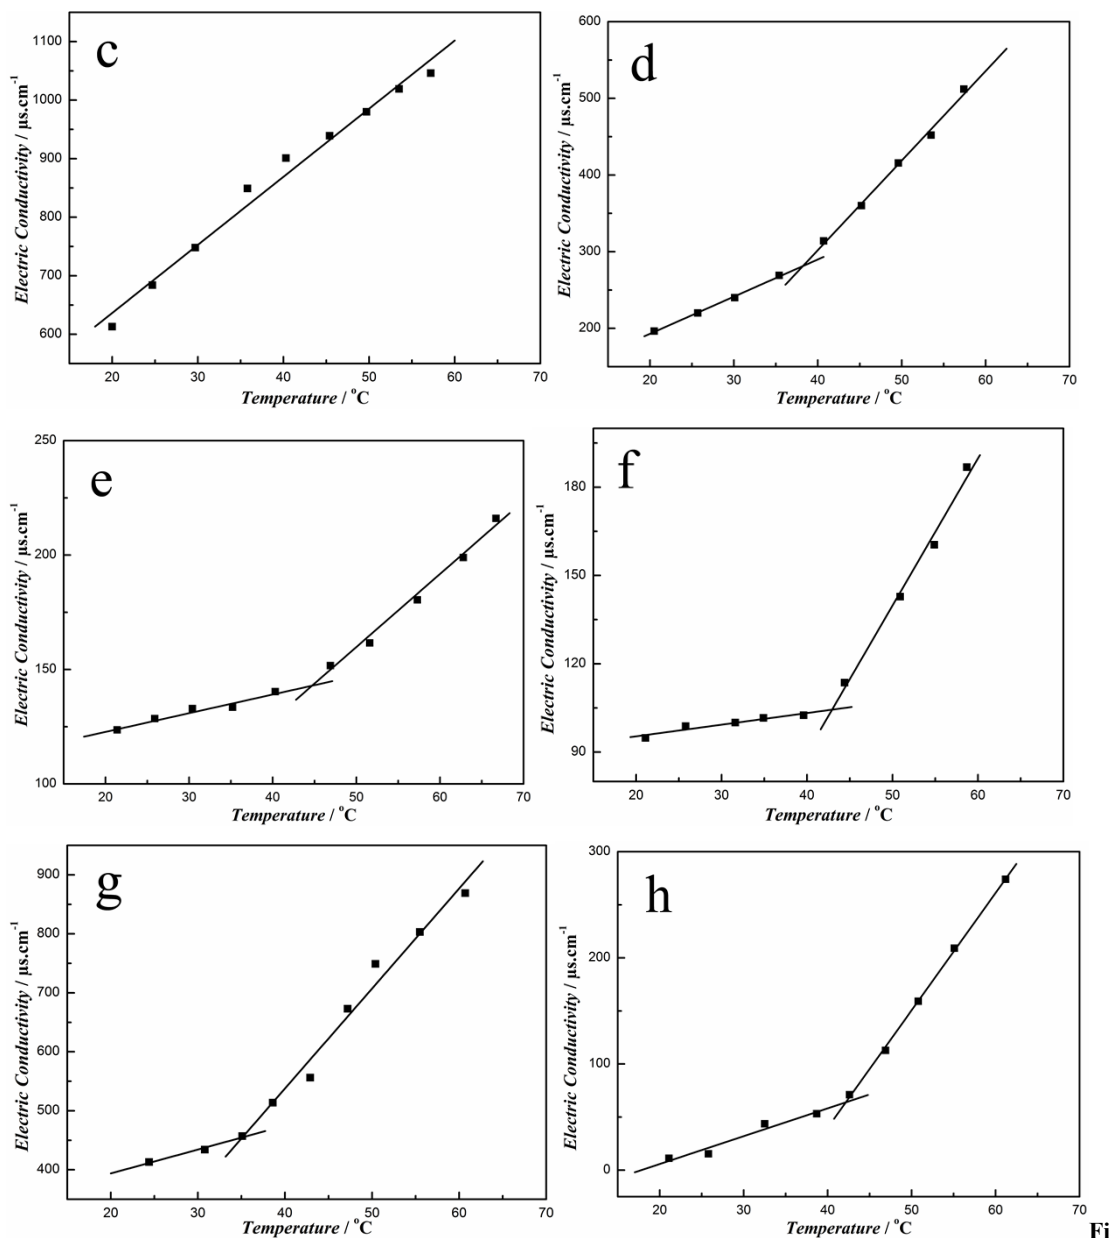

**g. S1** The electric conductivities of different gemini surfactants as a function of temperature: (a)  $\text{C}_{10}\text{OhpNC}_8$ , (b)  $\text{C}_{10}\text{OhpNC}_{14}$ , (c)  $\text{C}_{12}\text{OhpNC}_8$ , (d)  $\text{C}_{12}\text{OhpNC}_{10}$ , (e)  $\text{C}_{12}\text{OhpNC}_{12}$ , (f)  $\text{C}_{12}\text{OhpNC}_{14}$ , (g)  $\text{C}_{14}\text{OhpNC}_8$ , (h)  $\text{C}_{14}\text{OhpNC}_{10}$ .

## 2 CMC

The electric conductivities of  $\text{C}_m\text{OhpNC}_n$  were measured by Model Delta 326 conductometer at  $50^{\circ}\text{C}$ . The CMC values were determined by the break of conductivity vs. concentration plots.

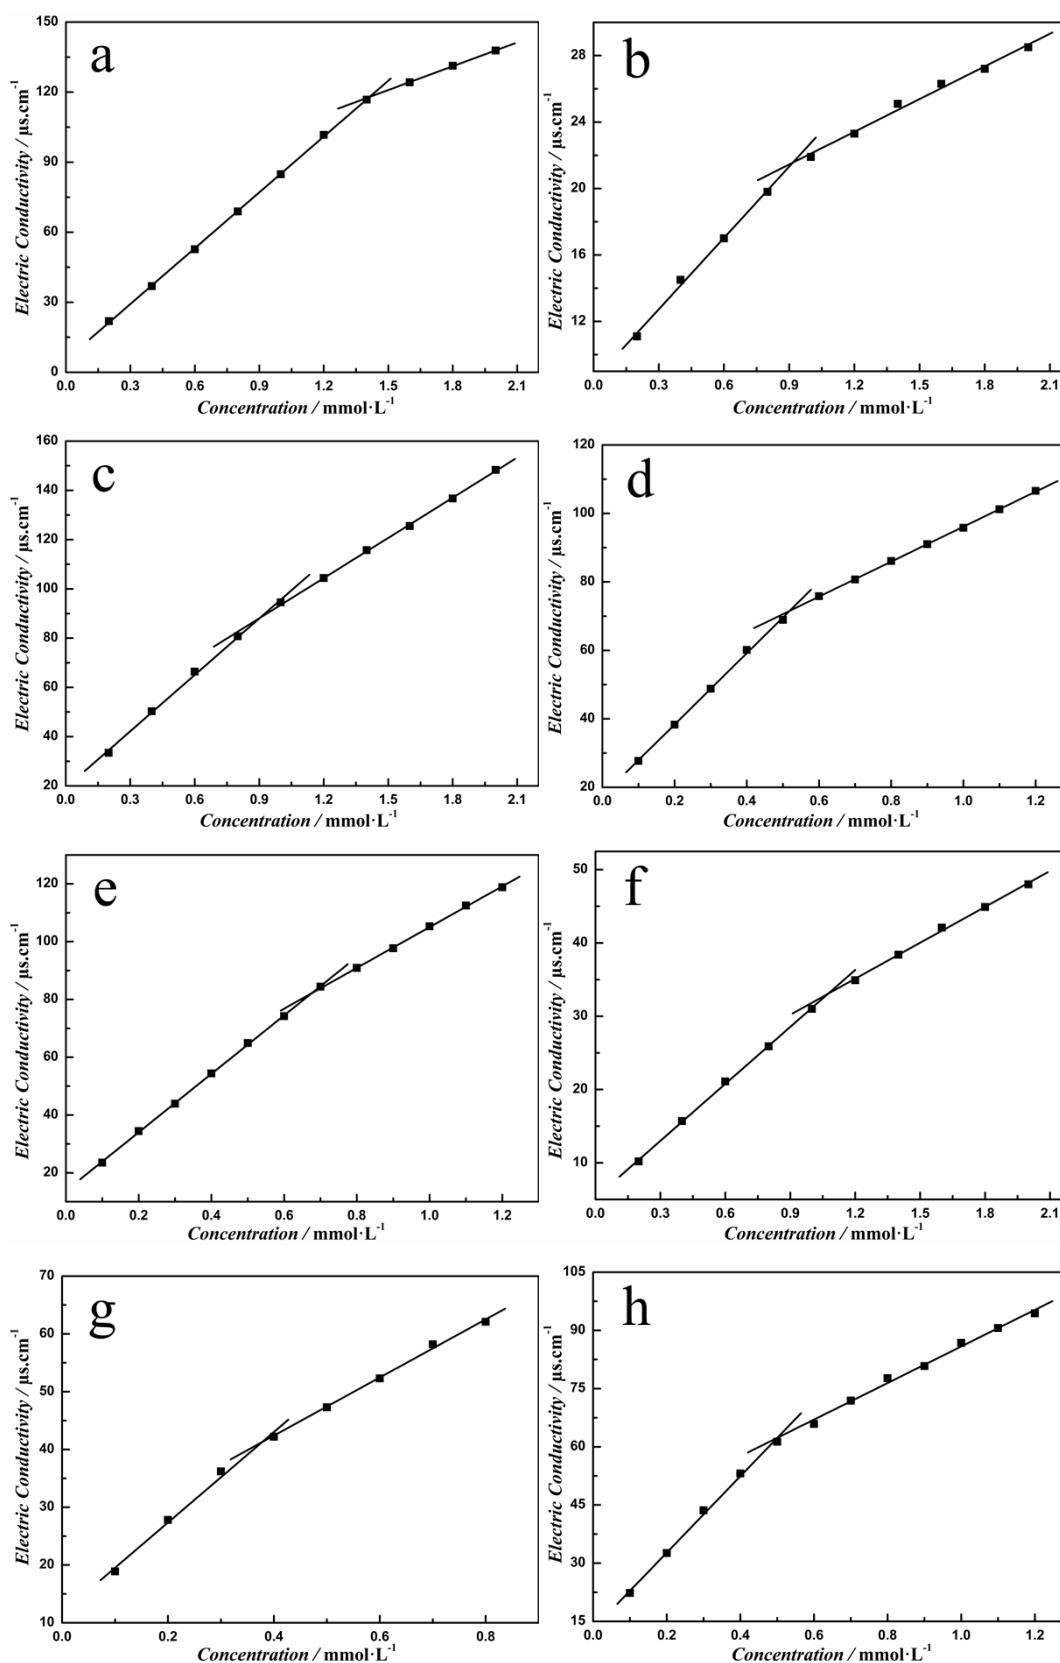

**Fig. S2** The electric conductivities of different gemini surfactants as a function of concentration: (a)  $\text{C}_{10}\text{OhpNC}_8$ , (b)  $\text{C}_{10}\text{OhpNC}_{14}$ , (c)  $\text{C}_{12}\text{OhpNC}_8$ , (d)  $\text{C}_{12}\text{OhpNC}_{10}$ , (e)  $\text{C}_{12}\text{OhpNC}_{12}$ , (f)  $\text{C}_{12}\text{OhpNC}_{14}$ , (g)  $\text{C}_{14}\text{OhpNC}_8$ , (h)  $\text{C}_{14}\text{OhpNC}_{10}$ .

## References

1 T. H. Zhou, J. X. Zhao, *J. Colloid Interface Sci.*, 2009, **331**, 476-483.

2 R. Zana, H. Lévy, D. Danino, Y. Talmon and K. Kwetkat, *Langmuir*, 1997, **13**, 402-408.
